# Supplementary material
Source: PubMed Central journal article supplement (PMC2852924)

**THREE DIFFERENT AND TISSUE-SPECIFIC NAD-MALIC ENZYME GENERATED BY ALTERNATIVE SUNUNIT ASSOCIATION IN ARABIDOPSIS THALIANA\***

Marcos Ariel Tronconi<sup>1</sup>, Verónica Graciela Maurino<sup>2</sup>, Carlos Santiago Andreo<sup>1</sup> and María Fabiana Drincovich<sup>1</sup>

<sup>1</sup>Centro de Estudios Fotosintéticos y Bioquímicos (CEFOBI), Universidad Nacional de Rosario, Suipacha 531, Rosario, Argentina.

<sup>2</sup>Botanisches Institut, Universität zu Köln, Otto-Fischer-Str. 6, 50674 Cologne, Germany.

Running Title: Arabidopsis mitochondrial malic enzyme

Address correspondence to: Carlos Santiago Andreo. Centro de Estudios Fotosintéticos y Bioquímicos (CEFOBI), Universidad Nacional de Rosario, Suipacha 531, 2000 Rosario, Argentina. Telephone Number: 54-341-4371955; Fax: 54-341-4370044. E-mail: [candreo@fbioyf.unr.edu.ar](mailto:candreo@fbioyf.unr.edu.ar), [carlosandreo@cefobi-conicet.gov.ar](mailto:carlosandreo@cefobi-conicet.gov.ar)

**SUPPLEMENTARY FIGURE LEGENDS**

**Supplementary Fig. 1. Native PAGE of chimeric NAD-MEs.**

Coomassie Blue-stained native-PAGE of recombinant NAD-ME1, NAD-ME2, NAD-ME1q and NAD-ME2q. Approximately 10 µg of each purified enzyme were loaded. Molecular weight markers (MM) were run in parallel.

**Supplementary Fig. 2. Expression analysis of NAD-ME in inflorescence by GUS staining.**

Analysis of *NAD-ME1::GUS* and *NAD-ME2::GUS* expression in Arabidopsis inflorescence. *NAD-ME1* is expressed in the filaments, vasculature of sepals and apical part of the gynoecium; while GUS expression driven by the *NAD-ME2* promoter was found in the filaments, apical part of the gynoecium and mature pollen grains. Construction of *NAD-ME::GUS* gene fusions, plant transformation and histochemical analysis of GUS activity were performed as described in (12).

**Supplementary Figure 1**

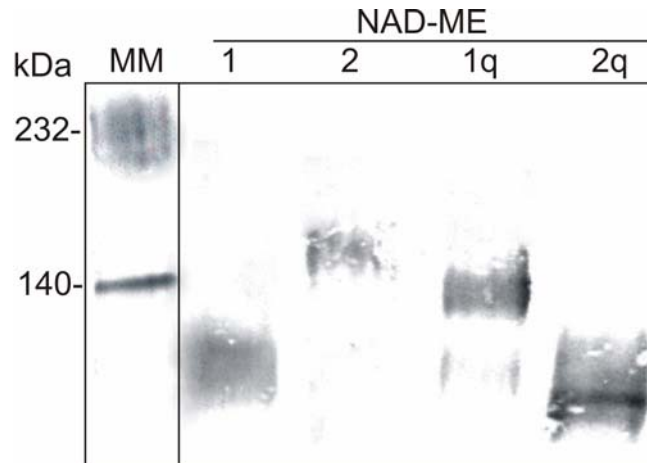

**Supplementary Figure 2**

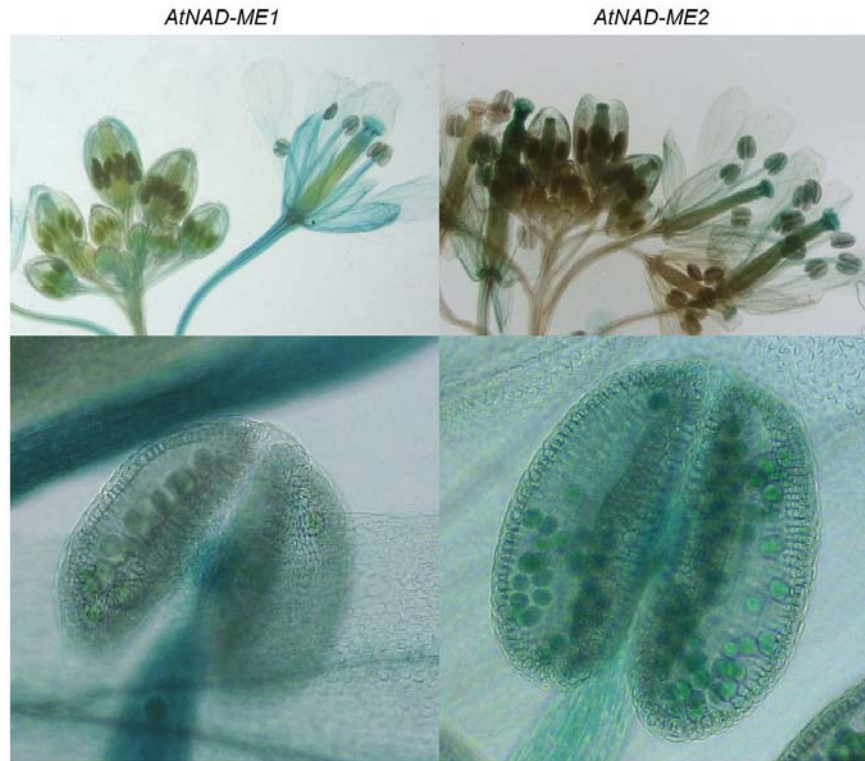

Supplement: supp_M109.097477_jbc.M109.097477-1.pdf [file supp_M109.097477_jbc.M109.097477-1.pdf]
